# Supplementary material for: Photocatalytic, anti-bacterial performance and development of 2,4-diaminophenylhydrazine chemical sensor probe based on ternary doped Ag·SrSnO3 nanorods
Source: Royal Society of Chemistry journal article supplement (doi:10.1039/d0nj04813e), 2020-12-18
Supplement: d0nj04813e1.pdf [file d0nj04813e1.pdf]

## Supplementary Figures

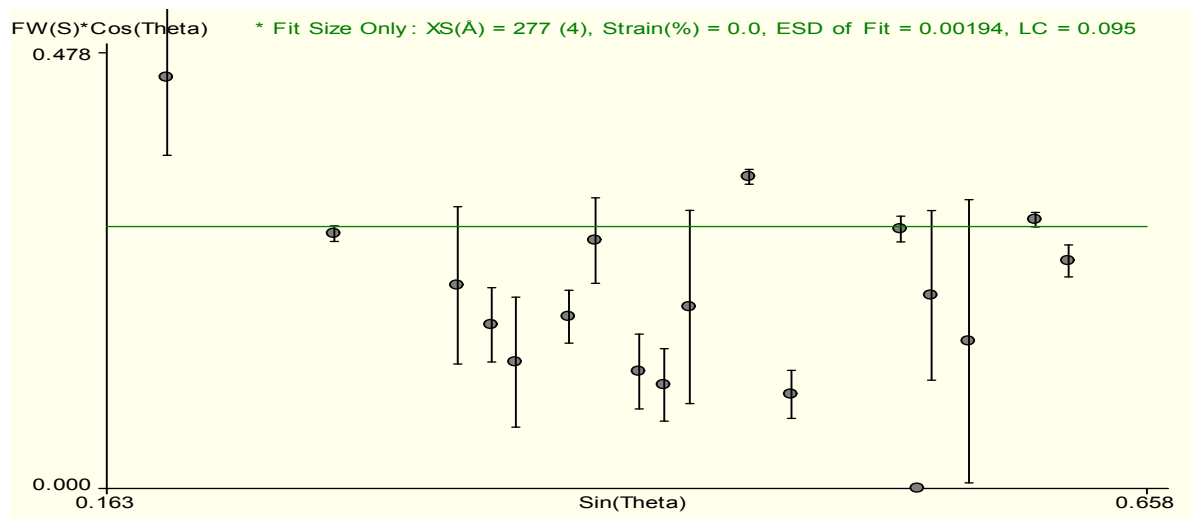

**Figure S1:** Size calculation using Williamson Hull Equation.

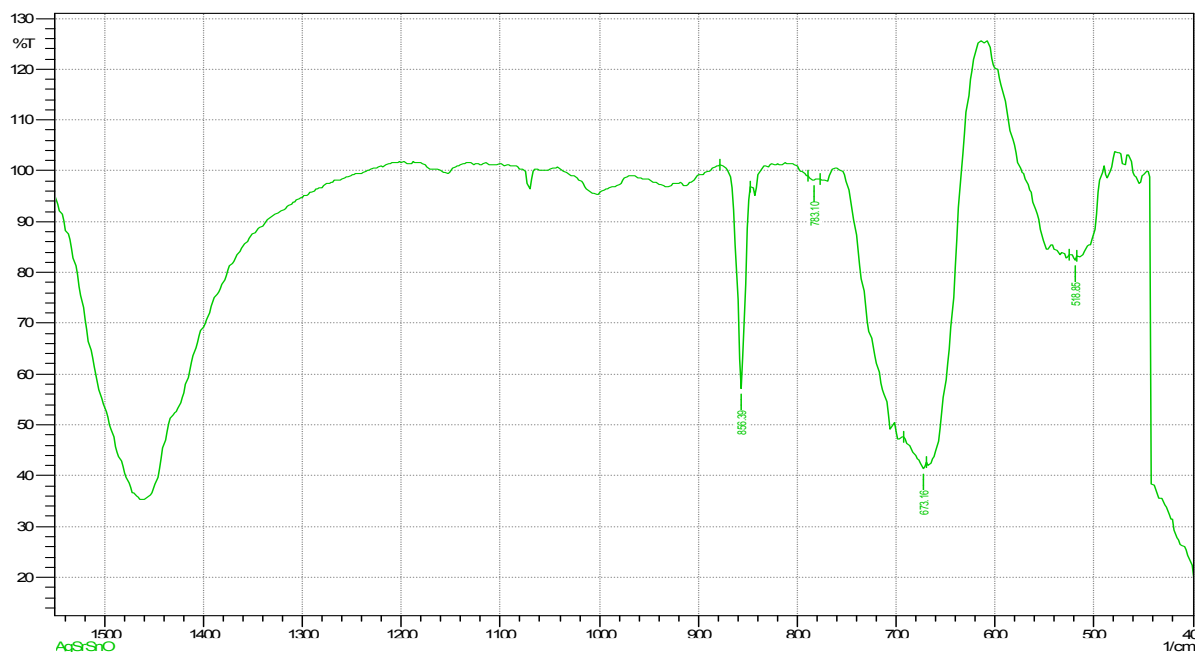

**Figure S2:** FTIR spectrum of Ag<sub>3</sub>SnO<sub>3</sub> nanocomposite

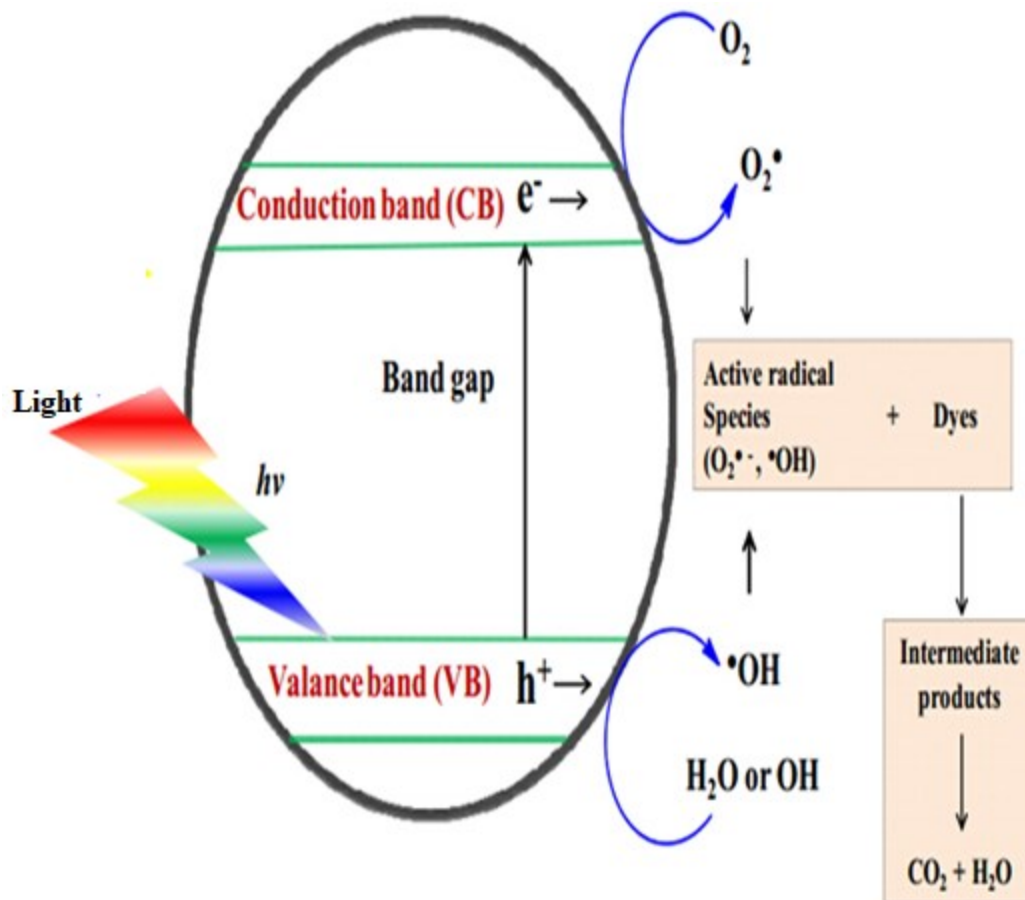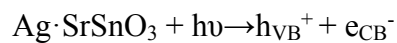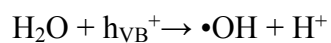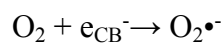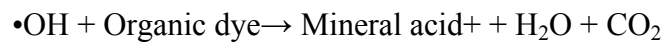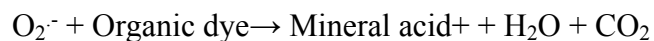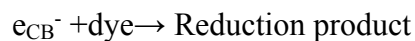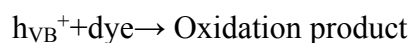

Figure S3. Pictorial mechanism of photo catalytic degradation of MV dyes by Ag·SrSnO<sub>3</sub> nanocomposite.
